# Supplementary material for: Exploring Anti-Nonalcoholic Fatty Liver Disease Mechanism of Gardeniae Fructus by Network Pharmacology, Molecular Docking, and Experiment Validation
Source: PubMed Central journal article supplement — ACS Omega. 2022 Jul 12;7(29):25521–31. doi: 10.1021/acsomega.2c02629 (PMC9330257; doi:10.1021/acsomega.2c02629), 2022-07-12
Supplement: ao2c02629_si_001.pdf [file ao2c02629_si_001.pdf]

Supporting Information

**Exploring Anti-nonalcoholic Fatty Liver Disease Mechanism of Gardeniae Fructus by Network Pharmacology, Molecular docking, and Experiment Validation**

Zhongyan Tang,<sup>1</sup> Lin Li,<sup>2</sup> Zhengxiang Xia<sup>3,\*</sup>

\*Correspondence: Zhengxiang Xia, [xzx5380537@163.com](mailto:xzx5380537@163.com)

Zhongyan Tang and Lin Li are the co-first authors.

<sup>1</sup>Department of Emergency and Critical Care Medicine, Jin Shan Hospital, Fudan University, Shanghai, 201508, China.

Zhongyan Tang, ORCID: <https://orcid.org/0000-0002-9044-9180>

<sup>2</sup>Department of Operative Dentistry and Endodontics, School & Hospital of Stomatology, Shanghai Engineering Research Center of Tooth Restoration and Regeneration, Tongji University, 399 Middle Yan Chang Road, Shanghai, 200072, China.

<sup>3</sup>Department of Pharmacy, School & Hospital of Stomatology, Shanghai Engineering Research Center of Tooth Restoration and Regeneration, Tongji University, 399 Middle Yan Chang Road, Shanghai, 200072, China

\*Zhengxiang Xia

Department of Pharmacy, School & Hospital of Stomatology, Shanghai Engineering Research Center of Tooth Restoration and Regeneration, Tongji University, 399 Middle Yan Chang Road, Shanghai, 200072, China

ORCID: <https://orcid.org/0000-0001-9042-9772>

Tel: +8621-66315500; E-mail: [xzx5380537@163.com](mailto:xzx5380537@163.com)

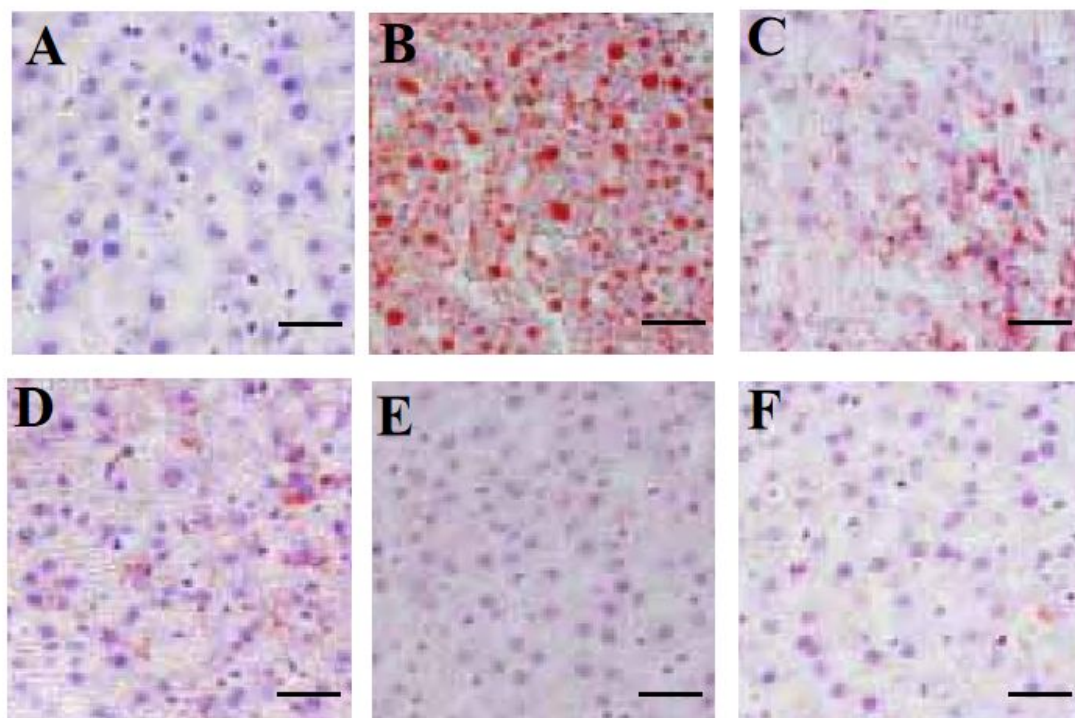

**Figure S1.** Liver tissue stained with haematoxylin and eosin (H&E). (A) Control group, (B) HFD-fed group; (C) HFD + 25 mg/kg GF; (D) HFD + 50 mg/kg GF; (E) HFD + 100 mg/kg GF; (F) HFD + Metformin. — Bar, 100  $\mu$ m.

**Table S1.** The relationship among compounds-targets-signal pathways

|                |                                          |
|----------------|------------------------------------------|
| crocetin       | ADRA1A                                   |
| crocetin       | ADRA1B                                   |
| genipin        | CA2                                      |
| oceanolic acid | PPARA                                    |
| oceanolic acid | FAS                                      |
| oceanolic acid | PTPN1                                    |
| quercetin      | PPARG                                    |
| quercetin      | ADRB2                                    |
| quercetin      | MAOB                                     |
| quercetin      | PPARG                                    |
| quercetin      | ACACA                                    |
| quercetin      | PPARA                                    |
| quercetin      | PPARD                                    |
| kaempferol     | PPARG                                    |
| kaempferol     | SLC6A2                                   |
| geniposide     | AMPK                                     |
| geniposide     | GLP1R                                    |
| geniposide     | CA2                                      |
| geniposide     | GCG                                      |
| chrysin        | SLC6A4                                   |
| PPARA          | PPAR signaling pathway                   |
| PPARD          | PPAR signaling pathway                   |
| PPARG          | PPAR signaling pathway                   |
| ADRB2          | Salivary secretion                       |
| ADRA1B         | Salivary secretion                       |
| ADRA1A         | Salivary secretion                       |
| ADRB2          | Neuroactive ligand-receptor interaction  |
| ADRA1B         | Neuroactive ligand-receptor interaction  |
| ADRA1A         | Neuroactive ligand-receptor interaction  |
| GLP1R          | Neuroactive ligand-receptor interaction  |
| GCG            | Glucagon signaling pathway               |
| PPARA          | Glucagon signaling pathway               |
| ACACA          | Glucagon signaling pathway               |
| PPARG          | AMPK signaling pathway                   |
| ACACA          | AMPK signaling pathway                   |
| ADRA1A         | AMPK signaling pathway                   |
| ADRB2          | Adrenergic signaling in cardiomyocytes 3 |
| ADRA1B         | Adrenergic signaling in cardiomyocytes 3 |
| ADRA1A         | Adrenergic signaling in cardiomyocytes 3 |
| ADRB2          | cGMP-PKG signaling pathway               |
| ADRA1B         | cGMP-PKG signaling pathway               |
| ADRA1A         | cGMP-PKG signaling pathway               |
| ADRB2          | Calcium signaling pathway                |

|        |                           |
|--------|---------------------------|
| ADRA1B | Calcium signaling pathway |
| ADRA1A | Calcium signaling pathway |
| PPARA  | cAMP signaling pathway    |
| ADRB2  | cAMP signaling pathway    |
| GLP1R  | cAMP signaling pathway    |

Table S2. The compounds' targets

| Compound      | targets |
|---------------|---------|
| crocetinI     | CHRM3   |
| crocetinI     | CHRM1   |
| crocetinI     | GABRA2  |
| crocetinI     | GABRA5  |
| crocetinI     | ADRA1A  |
| crocetinI     | GABRA3  |
| crocetinI     | ADRA1B  |
| crocetinI     | GABRA1  |
| crocetinI     | IGHG1   |
| crocetinI     | PTGS2   |
| crocetinI     | NCOA2   |
| crocetinI     | VCAM1   |
| genipin       | PTGS1   |
| genipin       | PTGS2   |
| genipin       | CA2     |
| genipin       | GABRA2  |
| genipin       | GABRA1  |
| genipin       | TK1     |
| genipin       | PRSS1   |
| genipin       | GRIA2   |
| genipin       | GABRA6  |
| genipin       | ABCC2   |
| genipin       | CA2     |
| genipin       | F2      |
| Oeanolic acid | CASP3   |
| Oeanolic acid | NAMPT   |
| Oeanolic acid | NFE2L2  |
| Oeanolic acid | NQO1    |
| Oeanolic acid | PPARA   |
| Oeanolic acid | PTGIR   |
| Oeanolic acid | TOP1    |
| Oeanolic acid | TOP2A   |
| Oeanolic acid | UGT2B11 |
| Oeanolic acid | UGT2B10 |
| Oeanolic acid | BAX     |

|               |        |
|---------------|--------|
| Oeanolic acid | MMP2   |
| Oeanolic acid | MMP9   |
| Oeanolic acid | CDK4   |
| Oeanolic acid | TNF    |
| Oeanolic acid | JUN    |
| Oeanolic acid | IL6    |
| Oeanolic acid | CDK6   |
| Oeanolic acid | CASP3  |
| Oeanolic acid | TP53   |
| Oeanolic acid | MAPK8  |
| Oeanolic acid | PTGS2  |
| Oeanolic acid | NFKBIA |
| Oeanolic acid | CASP8  |
| Oeanolic acid | FAS    |
| Oeanolic acid | MMP1   |
| Oeanolic acid | MMP3   |
| Oeanolic acid | MMP10  |
| Oeanolic acid | ICAM1  |
| Oeanolic acid | IL1B   |
| Oeanolic acid | CREB1  |
| Oeanolic acid | SELE   |
| Oeanolic acid | PTGER3 |
| Oeanolic acid | PTGS1  |
| Oeanolic acid | MCL1   |
| Oeanolic acid | PRKCG  |
| Oeanolic acid | ATF2   |
| Oeanolic acid | CSF2   |
| Oeanolic acid | PECAM1 |
| Oeanolic acid | VL     |
| Oeanolic acid | BIRC5  |
| Oeanolic acid | PTPN6  |
| Oeanolic acid | GAP43  |
| Oeanolic acid | DUOX2  |
| Oeanolic acid | NOS3   |
| Oeanolic acid | PTPN1  |
| Oeanolic acid | INPPL1 |
| Oeanolic acid | LITAF  |
| Oeanolic acid | CCND2  |
| Oeanolic acid | FASLG  |
| Oeanolic acid | CASP1  |
| Oeanolic acid | PLAU   |
| Oeanolic acid | CTSB   |
| Oeanolic acid | RELA   |
| Oeanolic acid | STAT3  |

|               |        |
|---------------|--------|
| Oeanolic acid | VEGF   |
| Oeanolic acid | CCND1  |
| Oeanolic acid | Bcl2   |
| Oeanolic acid | BCL2L1 |
| Oeanolic acid | FOS    |
| Oeanolic acid | CDKN1  |
| Oeanolic acid | ENPP7  |
| quercetin     | ATP5B  |
| quercetin     | CYP1A1 |
| quercetin     | CYP1B1 |
| quercetin     | CYP2C8 |
| quercetin     | HCK    |
| quercetin     | HIBCH  |
| quercetin     | MCL1   |
| quercetin     | PIM1   |
| quercetin     | SLC2A2 |
| quercetin     | STK17B |
| quercetin     | PTGS1  |
| quercetin     | AR     |
| quercetin     | PPARG  |
| quercetin     | PTGS2  |
| quercetin     | HSP90  |
| quercetin     | PIK3CG |
| quercetin     | NCOA2  |
| quercetin     | DPP4   |
| quercetin     | AKR1B1 |
| quercetin     | PRSS1  |
| quercetin     | TOP2   |
| quercetin     | KCNA2  |
| quercetin     | SCN5A  |
| quercetin     | F10    |
| quercetin     | ADRB2  |
| quercetin     | MMP3   |
| quercetin     | F7     |
| quercetin     | NOS3   |
| quercetin     | RXRA   |
| quercetin     | ACHE   |
| quercetin     | GABRA1 |
| quercetin     | MAOB   |
| quercetin     | RELA   |
| quercetin     | EGFR   |
| quercetin     | AKT1   |
| quercetin     | VEGF   |
| quercetin     | CCND1  |

|           |         |
|-----------|---------|
| quercetin | BCL2    |
| quercetin | BCL2L1  |
| quercetin | FOS     |
| quercetin | CDKN1   |
| quercetin | EIF6    |
| quercetin | BAX     |
| quercetin | CASP9   |
| quercetin | PLAU    |
| quercetin | MMP2    |
| quercetin | MMP9    |
| quercetin | MAPK1   |
| quercetin | IL10    |
| quercetin | EGF     |
| quercetin | E2F1    |
| quercetin | TNF     |
| quercetin | IL6     |
| quercetin | AHSA1   |
| quercetin | CASP3   |
| quercetin | TP53    |
| quercetin | ELK1    |
| quercetin | NFKBIA  |
| quercetin | POR     |
| quercetin | ODC1    |
| quercetin | XDH     |
| quercetin | CASP8   |
| quercetin | TOP1    |
| quercetin | RAF1    |
| quercetin | SOD1    |
| quercetin | PRKCA   |
| quercetin | MMP1    |
| quercetin | HIF1A   |
| quercetin | STAT1   |
| quercetin | RUNX1T1 |
| quercetin | CDC2    |
| quercetin | Hspa5   |
| quercetin | ERBB2   |
| quercetin | PPARG   |
| quercetin | ACACA   |
| quercetin | HMOX1   |
| quercetin | CYP3A4  |
| quercetin | CYP1A2  |
| quercetin | CAV1    |
| quercetin | MYC     |
| quercetin | F3      |

|           |          |
|-----------|----------|
| quercetin | GJA1     |
| quercetin | CYP1A1   |
| quercetin | ICAM1    |
| quercetin | IL1B     |
| quercetin | CCL2     |
| quercetin | SELE     |
| quercetin | VCAM1    |
| quercetin | PTGER3   |
| quercetin | IL8      |
| quercetin | PRKCB    |
| quercetin | BIRC5    |
| quercetin | DUOX2    |
| quercetin | NOS3     |
| quercetin | HSPB1    |
| quercetin | TGFB1    |
| quercetin | SULT1E1  |
| quercetin | MGAM     |
| quercetin | IL2      |
| quercetin | NR1I2    |
| quercetin | CYP1B1   |
| quercetin | CCNB1    |
| quercetin | PLAT     |
| quercetin | THBD     |
| quercetin | SERPINE1 |
| quercetin | COL1A1   |
| quercetin | IFNG     |
| quercetin | ALOX5    |
| quercetin | PTEN     |
| quercetin | IL1A     |
| quercetin | MPO      |
| quercetin | TOP2A    |
| quercetin | NCF1     |
| quercetin | ABCG2    |
| quercetin | HAS2     |
| quercetin | GSTP     |
| quercetin | NFE2L2   |
| quercetin | NQO1     |
| quercetin | PARP1    |
| quercetin | AHR      |
| quercetin | PSMD11   |
| quercetin | SLC2A4   |
| quercetin | COL3A1   |
| quercetin | TOP2A    |
| quercetin | CXCL11   |



|            |         |
|------------|---------|
| quercetin  | DCAF5   |
| quercetin  | NR1I3   |
| quercetin  | CHEK2   |
| quercetin  | INSR    |
| quercetin  | CLDN4   |
| quercetin  | PPARA   |
| quercetin  | PPARD   |
| quercetin  | HSF1    |
| quercetin  | CRP     |
| quercetin  | CXCL10  |
| quercetin  | IKBKB   |
| quercetin  | SPP1    |
| quercetin  | RUNX2   |
| quercetin  | RASSF5  |
| quercetin  | E2F1    |
| quercetin  | E2F2    |
| quercetin  | ACPP    |
| quercetin  | CTSD    |
| quercetin  | IGFBP3  |
| quercetin  | IGF2    |
| quercetin  | CD40LG  |
| quercetin  | IRF1    |
| quercetin  | ERBB3   |
| quercetin  | PON1    |
| quercetin  | DIO1    |
| quercetin  | PCOLCE  |
| quercetin  | NPEPPS  |
| quercetin  | HK2     |
| quercetin  | NKX3-1  |
| quercetin  | RASA1   |
| quercetin  | PRXC1A  |
| quercetin  | GSTM1   |
| quercetin  | GSTM2   |
| kaempferol | AHR     |
| kaempferol | CDK1    |
| kaempferol | CYP1B1  |
| kaempferol | NR1I2   |
| kaempferol | RPS6KA3 |
| kaempferol | UGT1A3  |
| kaempferol | UGT1A7  |
| kaempferol | UGT1A8  |
| kaempferol | UGT1A9  |
| kaempferol | UGT3A1  |
| kaempferol | NOS2    |

|            |        |
|------------|--------|
| kaempferol | PTGS1  |
| kaempferol | AR     |
| kaempferol | PPARG  |
| kaempferol | PTGS2  |
| kaempferol | HSP90  |
| kaempferol | PIK3CG |
| kaempferol | NCOA2  |
| kaempferol | DPP4   |
| kaempferol | PRSS1  |
| kaempferol | PGR    |
| kaempferol | CHRM1  |
| kaempferol | NOS3   |
| kaempferol | GABRA2 |
| kaempferol | ACHE   |
| kaempferol | SLC6A2 |
| kaempferol | CHRM2  |
| kaempferol | ADRA1B |
| kaempferol | GABRA1 |
| kaempferol | TOP2   |
| kaempferol | F7     |
| kaempferol | CALM   |
| kaempferol | RELA   |
| kaempferol | IKBKB  |
| kaempferol | AKT1   |
| kaempferol | BCL2   |
| kaempferol | BAX    |
| kaempferol | TNF    |
| kaempferol | JUN    |
| kaempferol | AHSA1  |
| kaempferol | CASP3  |
| kaempferol | MAPK8  |
| kaempferol | XDH    |
| kaempferol | MMP1   |
| kaempferol | STAT1  |
| kaempferol | CDC2   |
| kaempferol | PPARG  |
| kaempferol | HMOX1  |
| kaempferol | CYP3A4 |
| kaempferol | CYP1A2 |
| kaempferol | CYP1A1 |
| kaempferol | ICAM1  |
| kaempferol | SELE   |
| kaempferol | VCAM1  |
| kaempferol | NR1I2  |

|            |         |
|------------|---------|
| kaempferol | CYP1B1  |
| kaempferol | ALOX5   |
| kaempferol | HAS2    |
| kaempferol | GSTP    |
| kaempferol | AHR     |
| kaempferol | PSMD3   |
| kaempferol | SLC2A4  |
| kaempferol | NR1I3   |
| kaempferol | INSR    |
| kaempferol | DIO1    |
| kaempferol | PPP3CA  |
| kaempferol | PRXC1A  |
| kaempferol | GSTM1   |
| kaempferol | GSTM2   |
| kaempferol | AKR1C3  |
| kaempferol | SLPI    |
| kaempferol | CYP2E1  |
| kaempferol | GLP1R   |
| kaempferol | GSK3A   |
| kaempferol | GSK3B   |
| kaempferol | HMOX1   |
| kaempferol | IL6     |
| kaempferol | SELE    |
| kaempferol | VCAM1   |
| kaempferol | CA2     |
| kaempferol | BCL2    |
| kaempferol | HMOX1   |
| kaempferol | GAP43   |
| kaempferol | PLB1    |
| kaempferol | GCG     |
| kaempferol | GSTM1   |
| kaempferol | GSTM2   |
| kaempferol | ABCG2   |
| kaempferol | CYP19A1 |
| kaempferol | CYP1A1  |
| kaempferol | CYP1A2  |
| kaempferol | CYP1B1  |
| kaempferol | PYGB    |
| kaempferol | PYGL    |
| kaempferol | PYGM    |
| kaempferol | RELA    |
| kaempferol | TP53    |
| kaempferol | PTGS1   |
| kaempferol | AR      |

|            |         |
|------------|---------|
| kaempferol | PTGS2   |
| kaempferol | PDE3A   |
| kaempferol | SLC6A4  |
| kaempferol | GABRA1  |
| kaempferol | DPP4    |
| kaempferol | HSP90   |
| kaempferol | PIK3CG  |
| kaempferol | MAOB    |
| kaempferol | PKIA    |
| kaempferol | CDKN1   |
| kaempferol | TGFB1   |
| kaempferol | IL4     |
| kaempferol | CYP19A1 |
| kaempferol | IL13    |
| kaempferol | MS4A2   |
| geniposide | CYP2E1  |
| geniposide | GLP1R   |
| geniposide | GSK3A   |
| geniposide | GSK3B   |
| geniposide | HMOX1   |
| geniposide | IL6     |
| geniposide | SELE    |
| geniposide | VCAM1   |
| geniposide | CA2     |
| geniposide | BCL2    |
| geniposide | HMOX1   |
| geniposide | GAP43   |
| geniposide | PLB1    |
| geniposide | GCG     |
| geniposide | GSTM1   |
| geniposide | GSTM2   |
| chrysin    | ABCG2   |
| chrysin    | CYP19A1 |
| chrysin    | CYP1A1  |
| chrysin    | CYP1A2  |
| chrysin    | CYP1B1  |
| chrysin    | PYGB    |
| chrysin    | PYGL    |
| chrysin    | PYGM    |
| chrysin    | RELA    |
| chrysin    | TP53    |
| chrysin    | PTGS1   |
| chrysin    | AR      |
| chrysin    | PTGS2   |

|         |         |
|---------|---------|
| chrysin | PDE3A   |
| chrysin | SLC6A4  |
| chrysin | GABRA1  |
| chrysin | DPP4    |
| chrysin | HSP90   |
| chrysin | PIK3CG  |
| chrysin | MAOB    |
| chrysin | PKIA    |
| chrysin | CDKN1   |
| chrysin | TGFB1   |
| chrysin | IL4     |
| chrysin | CYP19A1 |
| chrysin | IL13    |
| chrysin | MS4A2   |
